# Supplementary material for: A thermoresponsive supramolecular copolymer hydrogel for the embolization of kidney arteries
Source: Royal Society of Chemistry journal article supplement (doi:10.1039/c6bm00597g), 2016-01-01
Supplement: c6bm00597g1.pdf [file c6bm00597g1.pdf]

## Supporting Information

**Table S1.** Preparation of PNAGA-PAAm hydrogels with varied NAGA/AAm ratios and monomer concentrations.

| Sample          | Ratio<br>(NAGA/AAm) | Concentration | H <sub>2</sub> O<br>( $\mu$ L) | Gel or solution |
|-----------------|---------------------|---------------|--------------------------------|-----------------|
| PNAGA-PAAm-3-15 | 3/1                 | 15%           | 850                            | Gel             |
| PNAGA-PAAm-5-15 | 5/1                 |               | 850                            | Gel             |
| PNAGA-PAAm-7-15 | 7/1                 |               | 850                            | Gel             |
| PNAGA-PAAm-9-15 | 9/1                 |               | 850                            | Gel             |
| PNAGA-PAAm-5-10 | 5/1                 | 10%           | 900                            | Gel             |
| PNAGA-PAAm-5-15 |                     | 15%           | 850                            | Gel             |
| PNAGA-PAAm-5-20 |                     | 20%           | 800                            | Gel             |

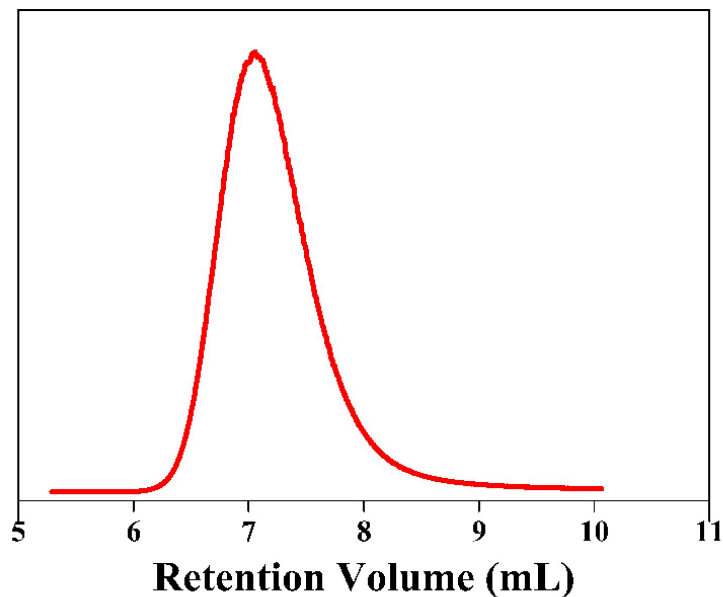

**Fig. S1** Gel permeation chromatography (GPC) elution trace of PNAGA-PAAm-5-15.
